# Supplementary material for: Causal relationship of CA3 back-projection to the dentate gyrus and its role in CA1 fast ripple generation
Source: PubMed Central journal article supplement (PMC8130286; doi:10.1186/s12868-021-00641-4), 2021-05-17

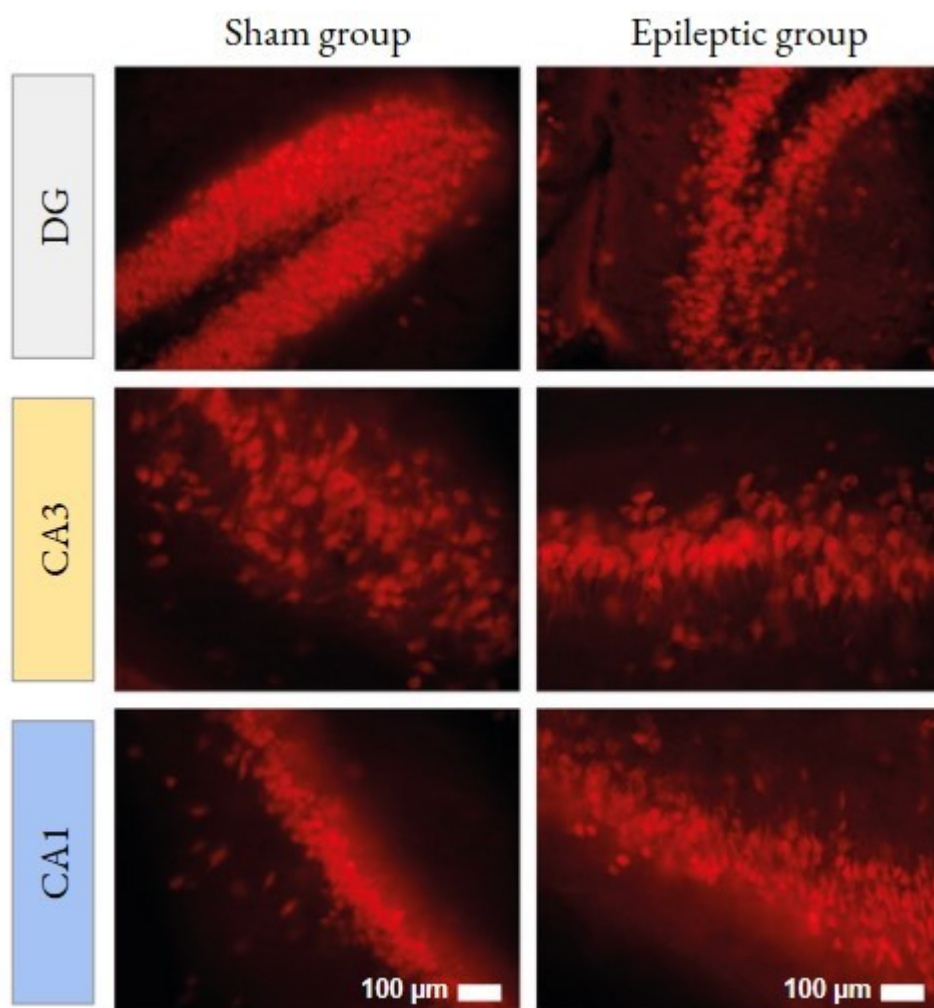

Supplement: 12868_2021_641_MOESM1_ESM.pdf [file 12868_2021_641_MOESM1_ESM.pdf]
